# Supplementary material
Source: HighWire-hosted journal article supplement (https://jnis.bmj.com/highwire/filestream/171079/field_highwire_adjunct_files/0/neurintsurg-2022-018670supp001_data_supplement.pdf)
Supplement: neurintsurg-2022-018670supp001_data_supplement.pdf [file neurintsurg-2022-018670supp001_data_supplement.pdf]

## Supplemental material

### Supplementary methods

#### Multiple imputation

Multiple imputation was performed to estimate likely modified Rankin Scale (mRS) scores for survivors lost to follow-up or with incomplete data on any of the Riksstroke variables on activities of daily living (ADL) used for estimating mRS.

The imputation model included selected baseline characteristics as predictor values only: age, sex, ADL variables (living conditions and home care service before stroke, toileting, dressing, mobility), vascular risk factors (previous stroke, atrial fibrillation, diabetes mellitus, hypertension), treatments (ongoing anticoagulation, intravenous thrombolysis), stroke severity (pre-EVT NIHSS), intracranial occlusion location, stroke onset to revascularization, type of anesthesia, wake-up stroke, and early outcome variables (NIHSS at 24 hours and degree of recanalization).

The following variables were both used as predictors and imputed: functional ability in toileting, dressing, mobility, as well as living conditions and need of support from next of kin.

Because the data displayed a nonmonotone pattern of missing values and the missing variables were predominantly categorical, we imputed using the fully conditional specification method based on a logistic regression model. Five imputations were conducted, each based on 10 iterations of the underlying Markov chain. mRS scores were then calculated for each data set using the translation algorithm previously described, and an average was presented. Because we used a large number of predictor variables, both from baseline, post-procedure and follow-up, it seemed reasonable to assume that data were missing at random.

### Supplementary results

Supplemental Table 1. Classification of complications in EVAS.

| Procedure-related complications        | Non-procedure related complications |
|----------------------------------------|-------------------------------------|
| Symptoms of hypoperfusion              | Pneumonia                           |
| Anesthesiologic problems               | Pulmonary edema                     |
| Related to endovascular device         | Arrhythmia                          |
| Other                                  | Epileptic seizures                  |
| Vessel perforation                     | Urosepsis                           |
| Extradural                             | Urinary tract infection             |
| Intradural                             | Delirium                            |
| Perforator damage                      | Intracranial hypertension           |
| Serious cardiac arrhythmia             | Kidney failure                      |
| Thromboembolism in lower extremities   | Fall accident                       |
| Complications caused by defect devices | Malignant media infarction          |

|                                       |  |
|---------------------------------------|--|
| Groin problems that require treatment |  |
|---------------------------------------|--|

Supplemental Table 2. Characteristics in followed up vs not followed up patients.

| Variable                                  | Followed up<br>N=1768<br>%(n) | Loss to follow-<br>up<br>N=431<br>%(n) | <i>p</i> |
|-------------------------------------------|-------------------------------|----------------------------------------|----------|
| <b>Patient characteristics</b>            |                               |                                        |          |
| Age median (IQR)                          | 73.5 (65–80)                  | 71 (61–79)                             | <0.001   |
| Female sex                                | 46.0% (814)                   | 46.6% (201)                            | 0.433    |
| Hypertension                              | 59.5% (1050)                  | 54.8% (234)                            | 0.08     |
| Atrial fibrillation                       | 47.1% (833)                   | 38.3% (165)                            | 0.001    |
| Diabetes                                  | 15.9% (280)                   | 15.6% (67)                             | 0.941    |
| Previous stroke                           | 10.6% (188)                   | 12.6% (54)                             | 0.263    |
| <b>Stroke characteristics</b>             |                               |                                        |          |
| Median NIHSS (IQR)                        | 16 (11–20)                    | 15 (10–19)                             | 0.260    |
| Wake-up stroke                            | 12.9% (227)                   | 12.1% (52)                             | 0.326    |
| Occlusion location DSA                    |                               |                                        | 0.683    |
| ICA                                       | 19.6% (346)                   | 18.3% (79)                             |          |
| MCA, M1                                   | 51.5% (911)                   | 50.8% (219)                            |          |
| MCA, M2                                   | 28.9% (511)                   | 30.9% (133)                            |          |
| IVT treatment                             | 54% (955)                     | 51% (220)                              | 0.328    |
| Median DTN (IQR)                          | 30 (20–45)                    | 27 (15–46)                             | 0.077    |
| Median OTN (IQR)                          | 99 (75–133)                   | 100 (72–140)                           | 0.769    |
| Ongoing anticoagulation                   | 16% (283)                     | 15.5% (67)                             | 0.883    |
| <b>Process time and treatment details</b> |                               |                                        |          |
| Secondary transport to CSC                | 61.7% (1087)                  | 60.3% (260)                            | 0.620    |
| Median OTG (IQR)                          | 225 (158–341)                 | 231 (153–367)                          | 0.508    |
| Median NTG (IQR)                          | 97 (55–160)                   | 87 (50–168)                            | 0.083    |
| Median OTR (IQR)                          | 288 (210–412)                 | 303 (216–424)                          | 0.193    |
| Successful reperfusion                    | 85.4% (1494)                  | 83.4% (357)                            | 0.296    |
| Anesthesia                                |                               |                                        | 1.000    |

|                                                                                                                                                                                                                                                                                                                                                                                                                                       |              |             |              |
|---------------------------------------------------------------------------------------------------------------------------------------------------------------------------------------------------------------------------------------------------------------------------------------------------------------------------------------------------------------------------------------------------------------------------------------|--------------|-------------|--------------|
| Conscious sedation                                                                                                                                                                                                                                                                                                                                                                                                                    | 63.3% (1118) | 63.4% (272) |              |
| General anesthesia                                                                                                                                                                                                                                                                                                                                                                                                                    | 36.7% (647)  | 36.6% (157) |              |
| <b>EVT technique</b>                                                                                                                                                                                                                                                                                                                                                                                                                  |              |             | <b>0.731</b> |
| DAC                                                                                                                                                                                                                                                                                                                                                                                                                                   | 20.8% (367)  | 19.3% (83)  |              |
| Stent retriever +-DAC                                                                                                                                                                                                                                                                                                                                                                                                                 | 74.9% (1324) | 77.3% (333) |              |
| Other                                                                                                                                                                                                                                                                                                                                                                                                                                 | 1.2% (22)    | 0.9% (4)    |              |
| Only attempt                                                                                                                                                                                                                                                                                                                                                                                                                          | 3.1% (55)    | 2.6% (11)   |              |
| <b>Early neurological outcome</b>                                                                                                                                                                                                                                                                                                                                                                                                     |              |             |              |
| Median 24-h NIHSS                                                                                                                                                                                                                                                                                                                                                                                                                     | 6 (2–14)     | 8 (3–15)    | 0.005        |
| <b>Adverse events</b>                                                                                                                                                                                                                                                                                                                                                                                                                 |              |             |              |
| sICH                                                                                                                                                                                                                                                                                                                                                                                                                                  | 4.5% (64)    | 6.8% (24)   | 0.075        |
| IQR=interquartile range, IVT=intravenous thrombolysis, NIHSS=National Institute of Health Stroke Scale, ICA= internal carotid artery, DSA= digital subtraction angiography, MCA= middle cerebral artery, sICH=symptomatic intracerebral hemorrhage, CSC=comprehensive stroke center, OTG=onset-to-groin, OTR=onset-to-revascularization, DTN=door-to-needle, OTN=onset-to-needle, NTG=needle-to-groin, DAC=direct aspiration catheter |              |             |              |

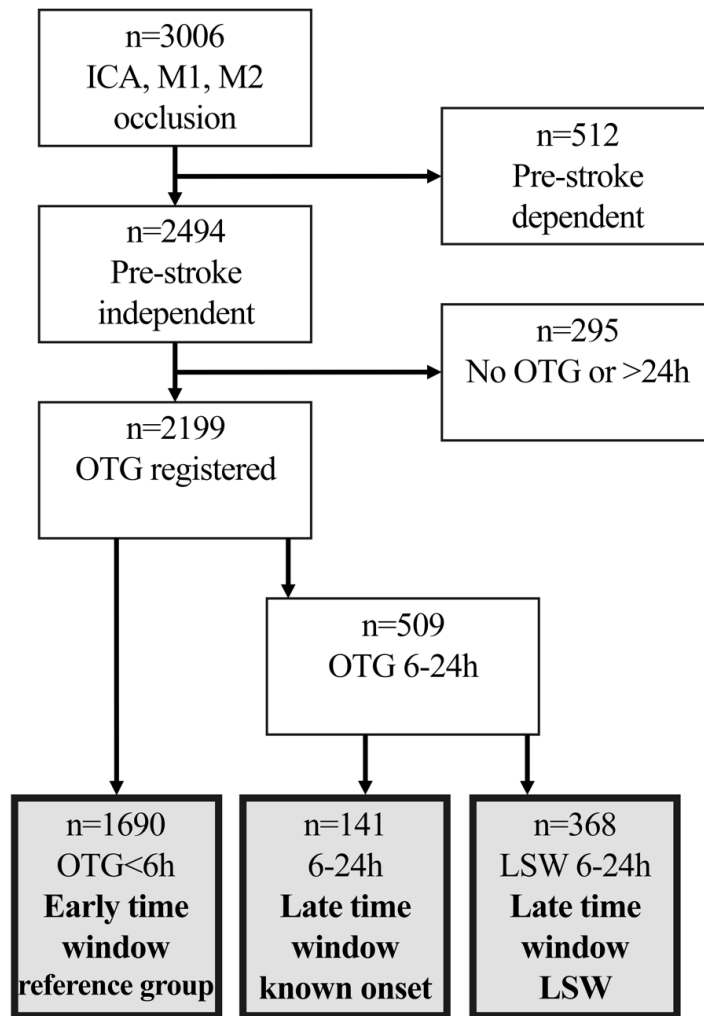

Supplemental Figure 1. Study flowchart.

## A. mRS @ 3 months without missing

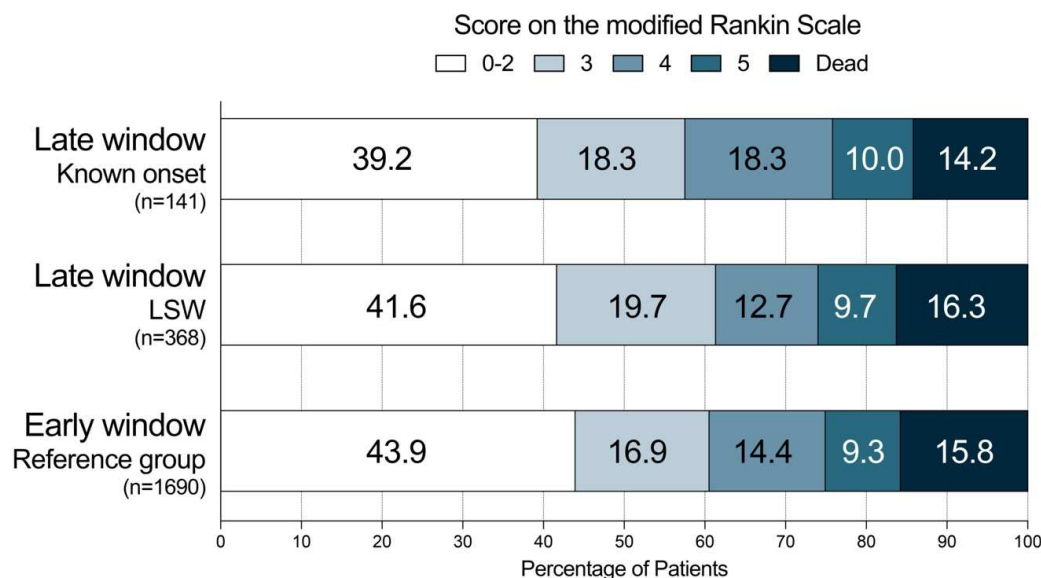

## B. mRS @ 3 months including missing

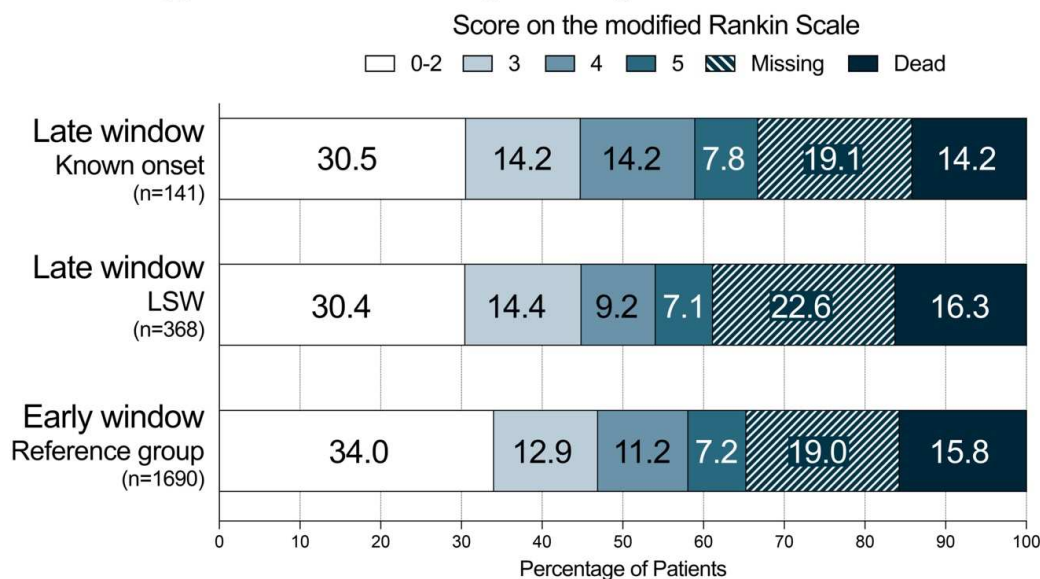

Supplemental Figure 2. Distribution on the modified Rankin scale at 90 days. In panel A with omission of patients lacking complete follow-up, and in B including loss to follow-up as a separate category (Missing).
